# Supplementary material
Source: PubMed Central journal article supplement (PMC7217032)
Supplement: NIHMS1540172-supplement-Info.pdf [file NIHMS1540172-supplement-Info.pdf]

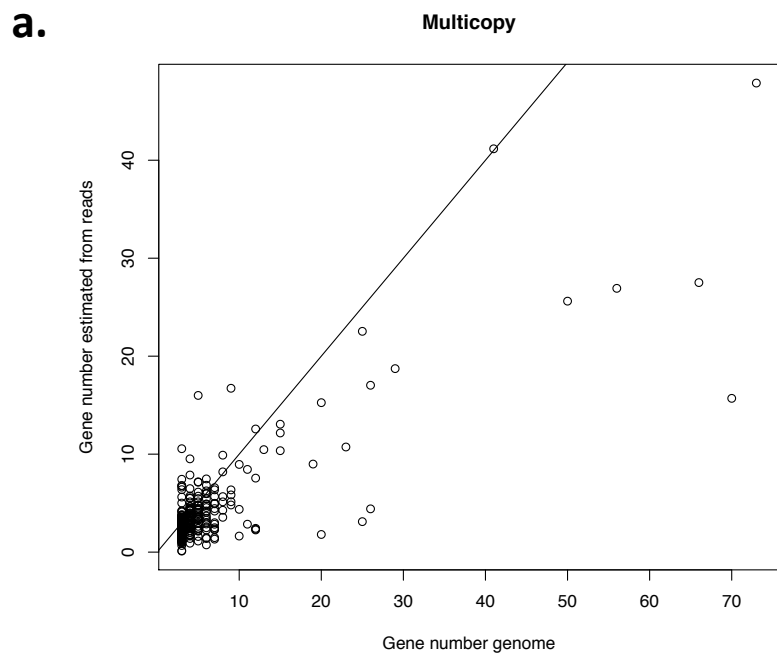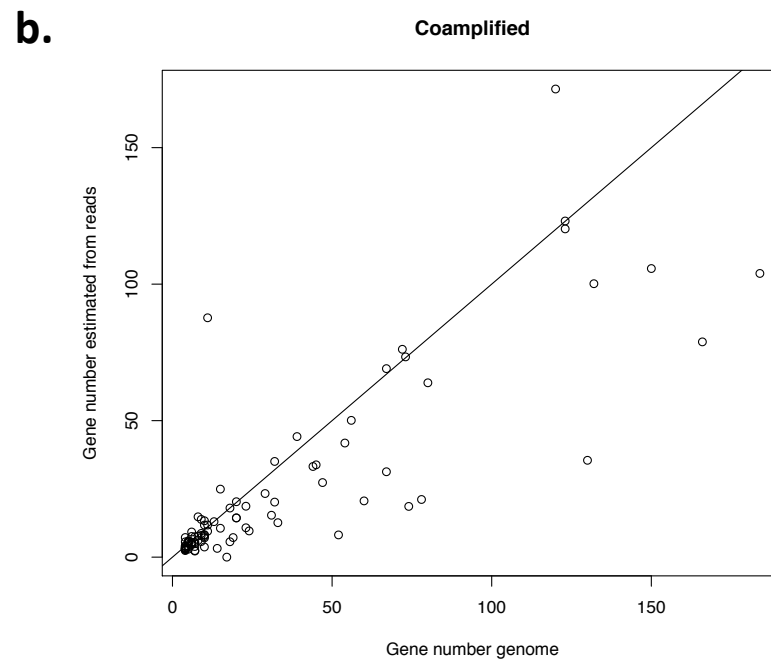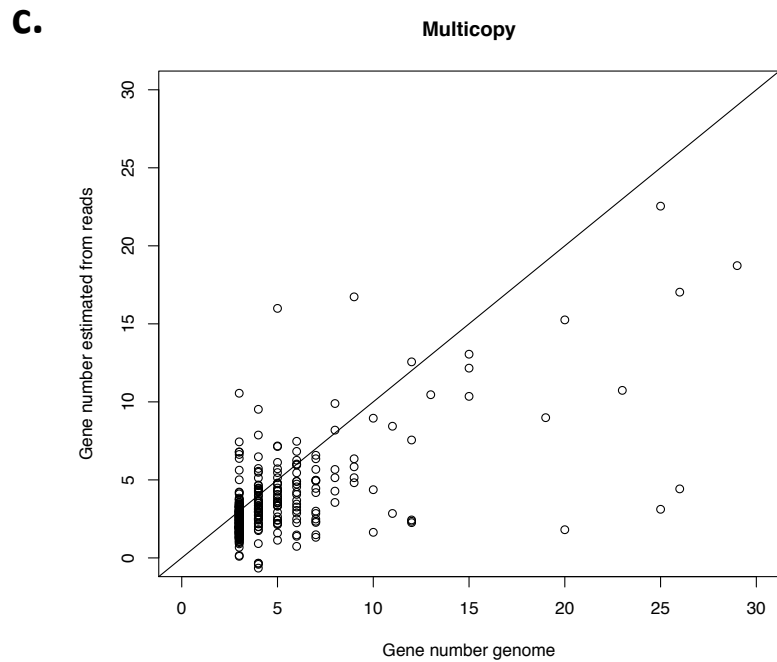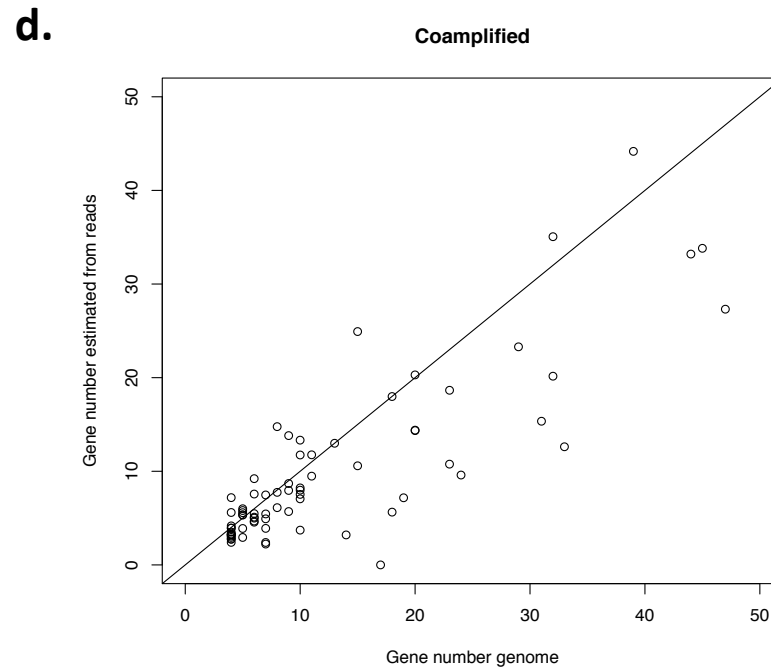

**Supplementary Figure 1. Validation of multi-copy and co-amplified Y genes in the *D. miranda* genome assembly using Illumina read coverage analysis from the reference strain (MSH22).** Shown is the gene copy number from the genome assembly and the estimated copy number based on read mapping to A) multi-copy genes (Pearson correlation = 0.82) and B) co-amplified genes (Pearson correlation = 0.84) with the 1:1 line shown. Zoomed in regions for multi-copy and co-amplified genes are shown in C) and D). Note that our coverage analysis typically underestimates the number of Y-linked copies found in the assembly, presumably due to many multi-copy genes being fragmented in the assembly.

## Muller C (Neo-X)

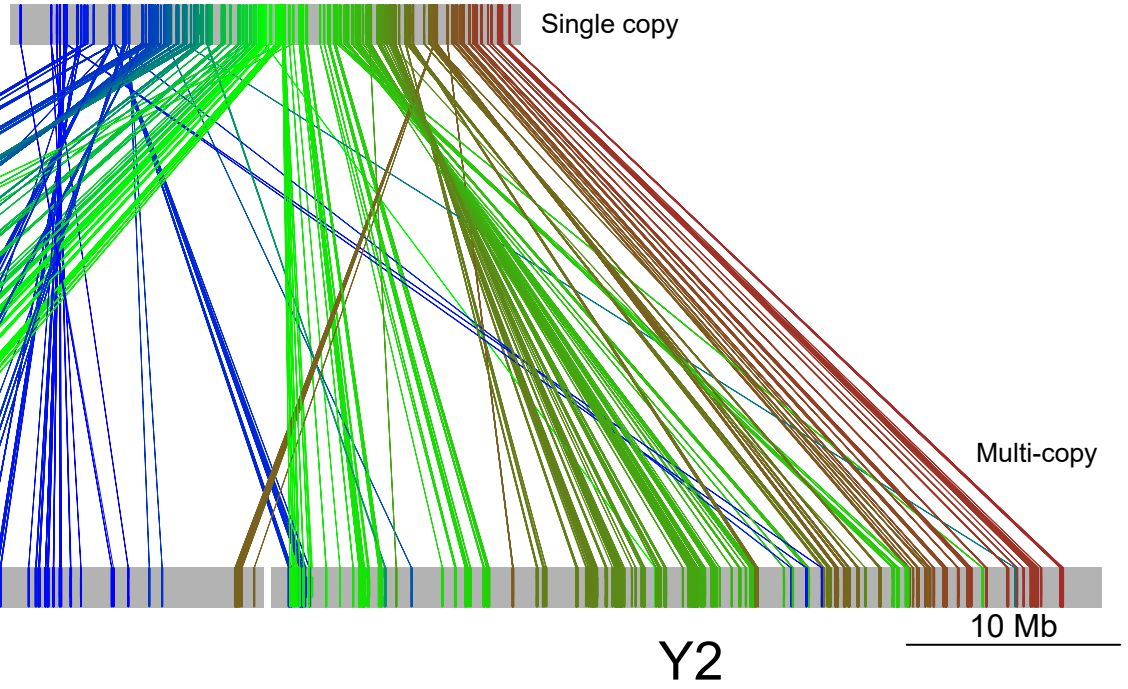

**Supplementary Figure 2. Location of multi-copy Y genes.** The genomic coordinates of genes identified as multi-copy on the two largest Y-chromosome scaffolds (Y1 and Y2) and their corresponding single copy location on the neo-X (Muller C). Most multi-copy genes on the Y exist in tandem and therefore there is a substantial overlap of plotting lines. Note that the Y/neo-Y-chromosomes in our current assembly in *D. miranda* consists of three major scaffolds (Y1, Y2, Y3, with Y3 possibly corresponding to the ancestral Y).

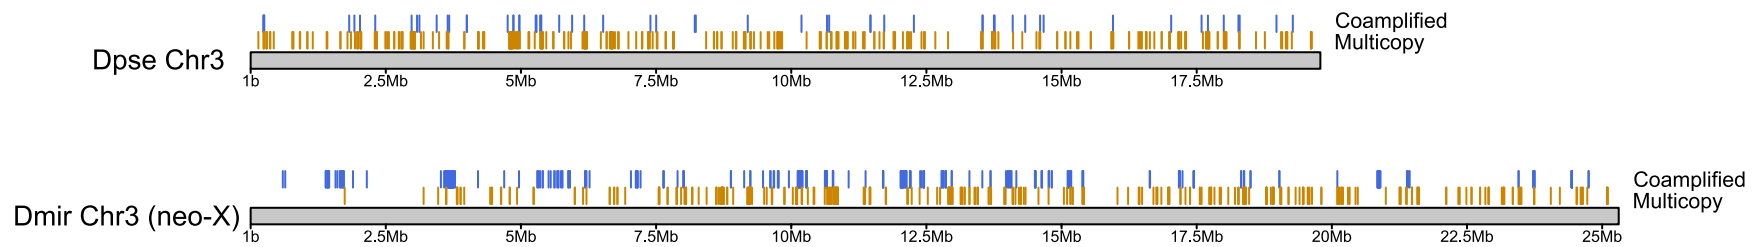

**Supplementary Figure 3. Location of orthologs of multi-copy Y genes and co-amplified X/Y genes in *D. pseudoobscura* and *D. miranda*.** Each line shows the location of the ortholog of a co-amplified X/Y gene (in blue), or a multi-copy Y gene (in orange) along *D. pseudoobscura* chr3, or the neo-X of *D. miranda*. Of the 363 multi-copy genes identified on the Y/neo-Y of *D. miranda*, 349 are located on chr3 of *D. pseudoobscura*, 2 genes are on chr2, 7 genes with unknown location, 1 gene on XL, and 4 genes on XR. Of the 94 co-amplified X/Y genes, 59 are located on chr3 of *D. pseudoobscura*, 4 genes are on chr2, 1 gene on chr4, 16 genes with unknown location, 6 genes on XL, and 8 genes on XR.

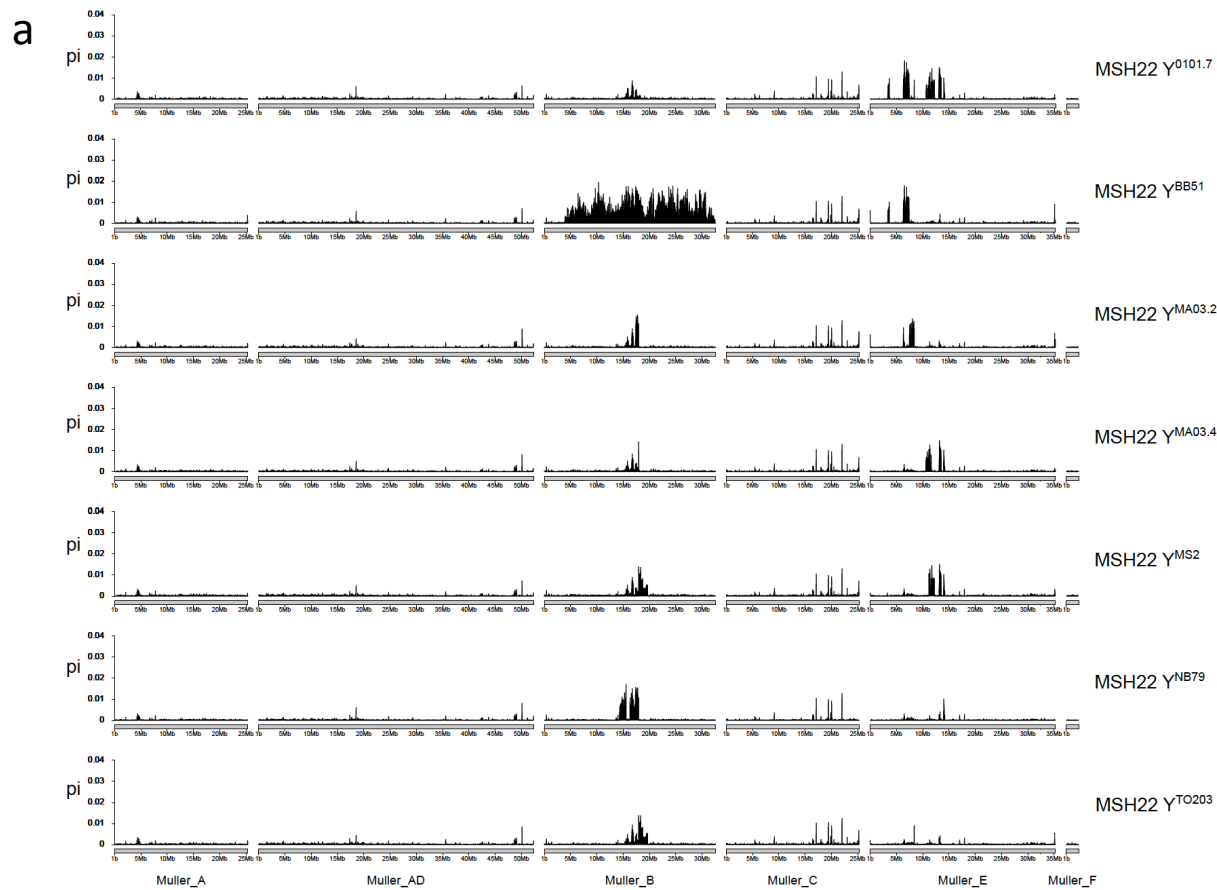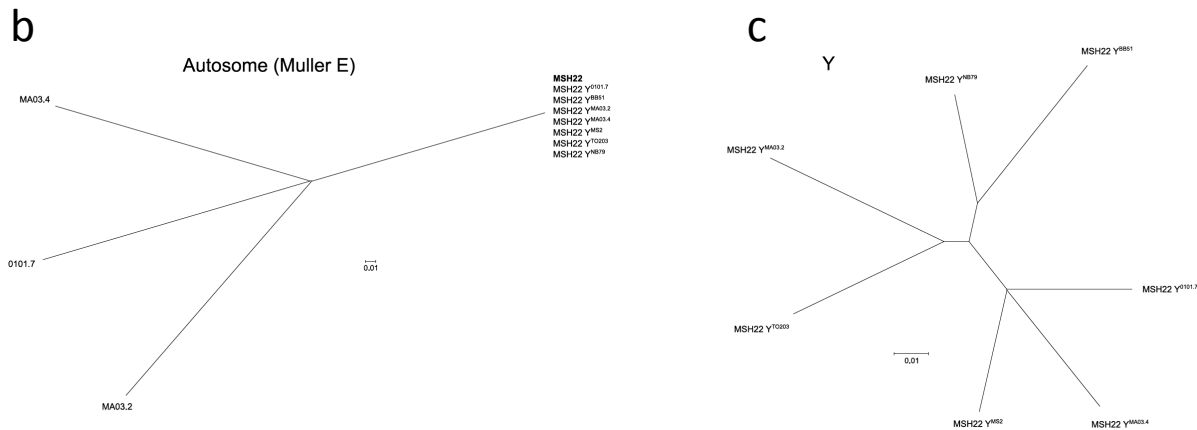

**Supplementary Figure 4. Properties of Y-chromosome replacement lines.** A) Individual nucleotide diversity ( $\pi$ ) shown for each replacement line. Peaks identify regions of residual heterozygosity in each Y-chromosome replacement line. B) Phylogenetic networks of autosomal SNPs of the seven Y-chromosome replacement lines and three lines from which some Y-chromosomes were derived. As expected, all Y replacement lines cluster with MSH22. C) Phylogenetic network of SNPs showing seven distinct Y types.

**neo-X - FBgn0079631 (Dicer-2)**

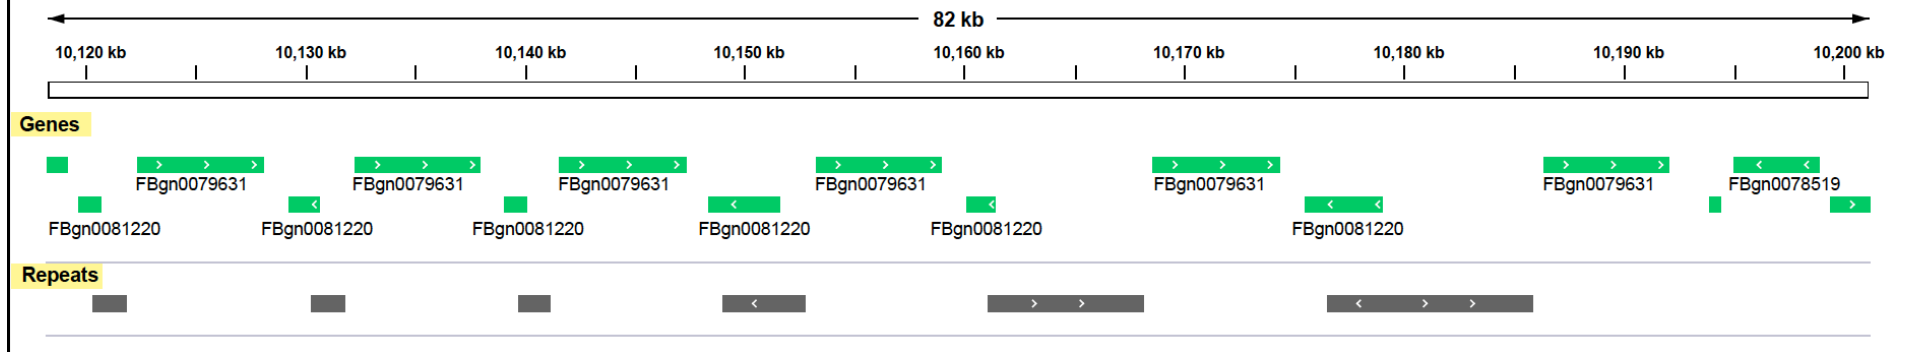

**neoY - FBgn0079631 (Dicer-2)**

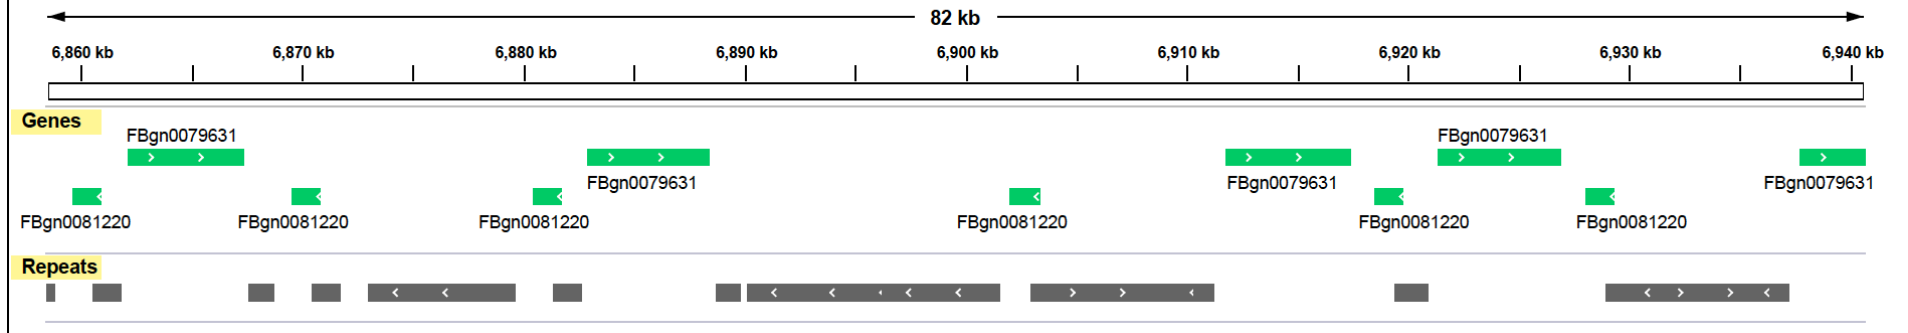

**Supplementary Figure 5.** Repeats may contribute to accumulation of multi-copy genes. Transposable elements often flank multi-copy Y genes, and may have contributed to amplification of genes on the X and Y. Genes are shown in green, and TEs are shown in gray.

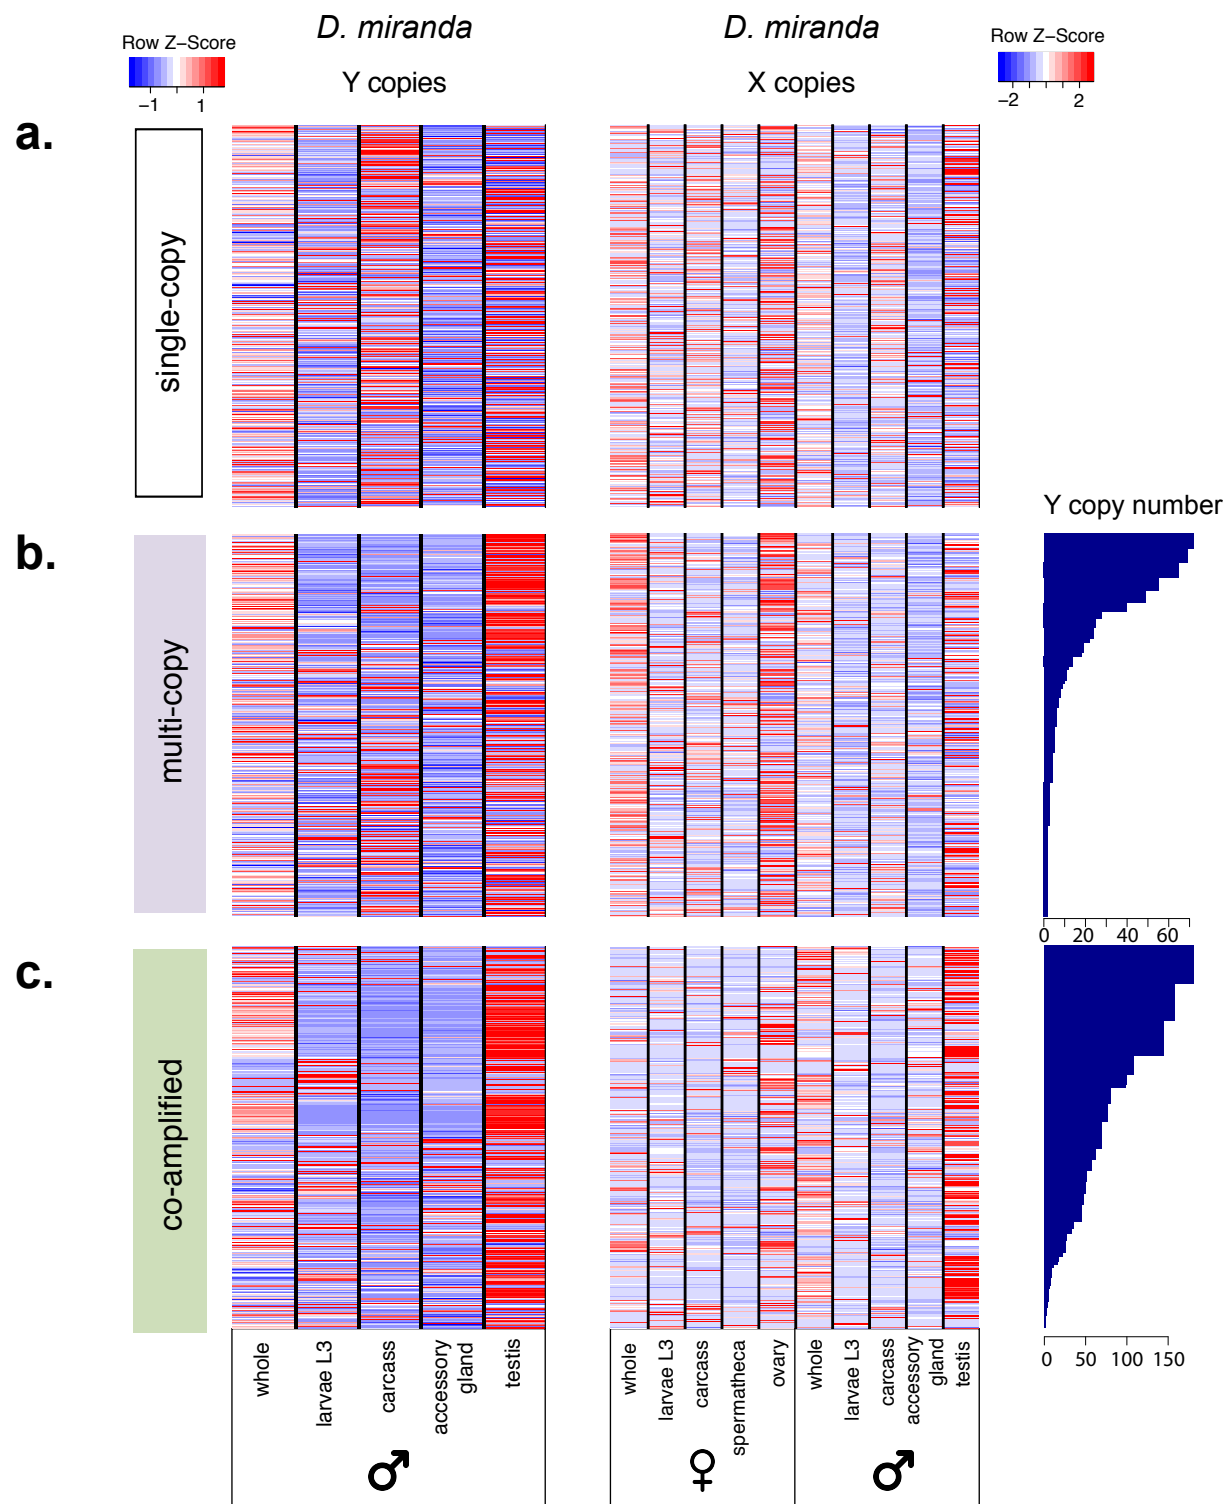

**Supplementary Figure 6.** Expression patterns of X- and Y-linked genes for **A.** single-copy X- and Y-linked genes; **B.** multi-copy Y-linked genes and their X homologs; **C.** co-amplified X and Y genes. Expression for individual gene copies is shown. Expression values were row-normalized to obtain Z-scores with a mean of 0 and standard deviation of 1, using the built-in scale = 'row' argument in the heatmap.2 function from the package gplots in R. The data shown are presented in **Data Supplement 16.**

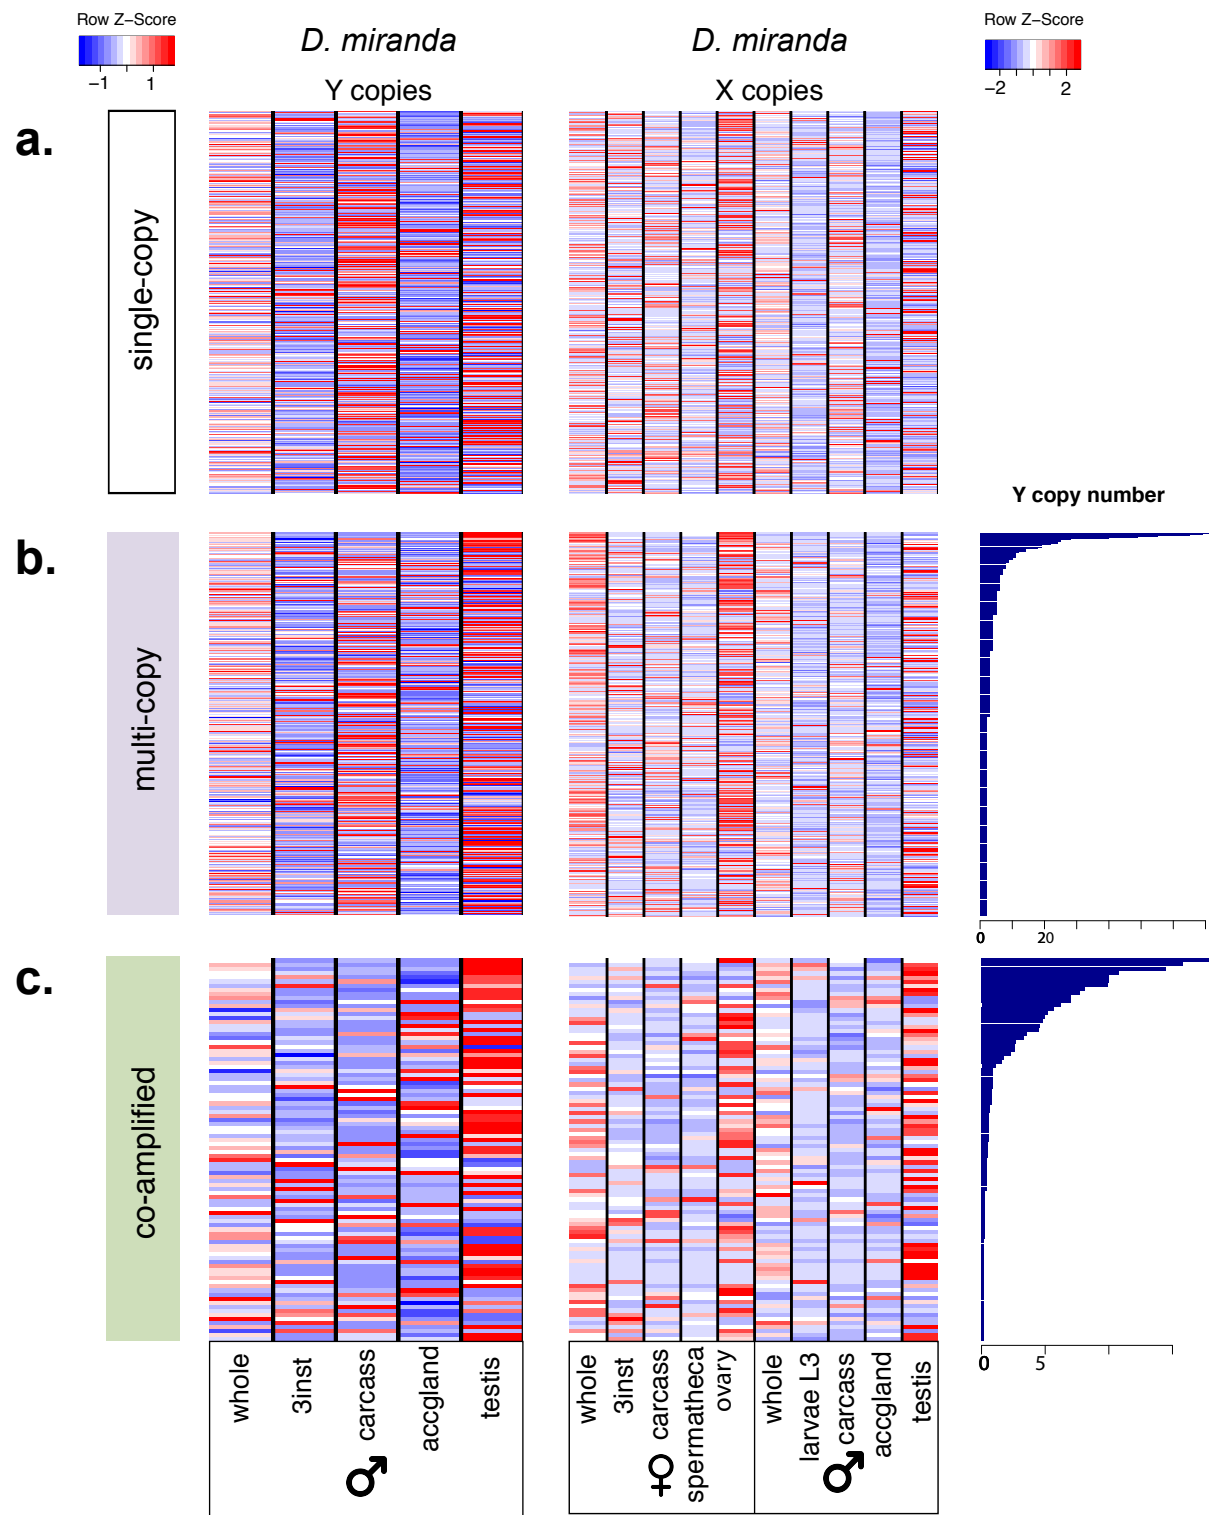

**Supplementary Figure 7.** Expression patterns of X- and Y-linked genes for **A.** single-copy X- and Y-linked genes; **B.** multi-copy Y-linked genes and their X homologs; **C.** co-amplified X and Y genes. Total summed expression for all gene copies of a gene family is shown. Expression values were row-normalized to obtain Z-scores with a mean of 0 and standard deviation of 1, using the built-in scale = 'row' argument in the heatmap.2 function from the package gplots in R. The data shown are presented in **Data Supplement 17.**

### Color Key

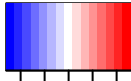

-4 0 4  
Row Z-Score

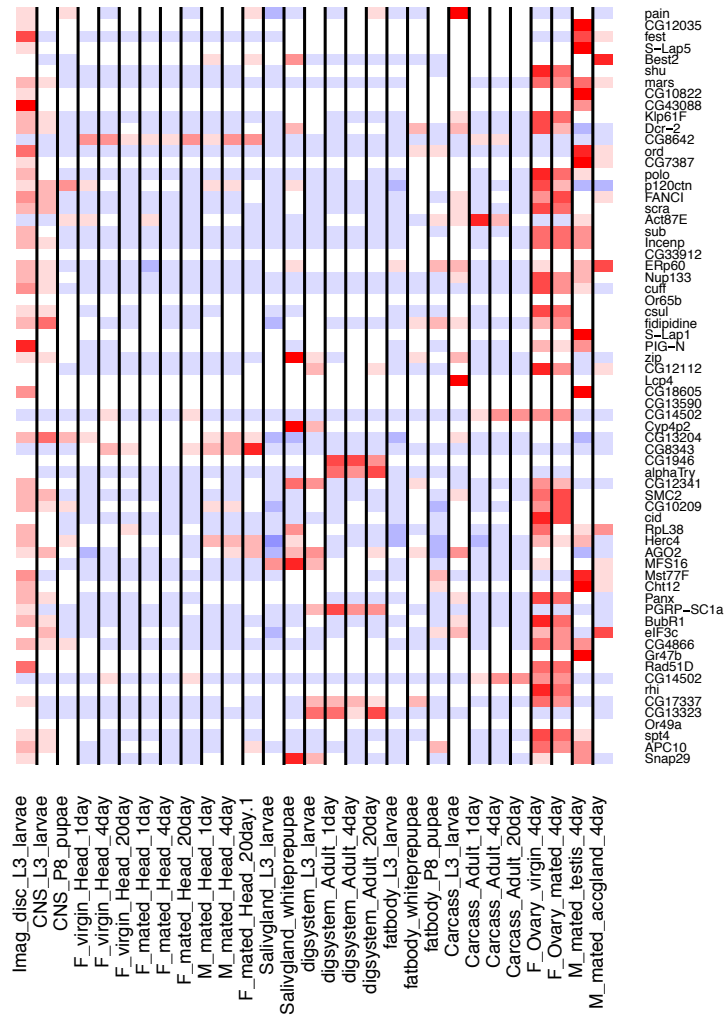

**Supplementary Figure 8.** Tissues-specific expression patterns of orthologs of co-amplified X/Y genes in *D. melanogaster*. FPKM values were downloaded from flybase.org. The data shown are presented in **Data Supplement 18**.



#### **Additional Supplementary Files** (as Spreadsheet-based Tables)

**Supplementary Table 1. Gene loss on the different Muller elements of *D. miranda*.** Shown are genes in *D. pseudoobscura* for different chromosomes that are absent on their homologous chromosome arm in *D. miranda*. The table gives *D. pseudoobscura* gene ID (FBgn), *D. melanogaster* ortholog, the chromosomal location of the gene in *D. pseudoobscura*, the tissue of highest expression in *D. pseudoobscura*, the category of the gene, and whether the gene is present somewhere else in the *D. miranda* genome.

**Supplementary Table 2. Overview of multi-copy Y genes.** Shown are total copy numbers for multi-copy Y genes, as well as the number of full-length (>90%) and partial Y copies (50-90%; 25-50%; and less than 25% compared to the length of the orthologous gene in *D. pseudoobscura*). The expression spreadsheet shows expression of orthologs of multi-copy Y genes in *D. pseudoobscura*, and the GO analysis shows the orthologous genes in *D. melanogaster*. No significant GO enrichment terms were detected.

**Supplementary Table 3. Overview of co-amplified X/Y genes.** Shown are total copy number for co-amplified X and Y genes, as well as the numbers of full-length (>90%) and partial X and Y copies (50-90%; 25-50%; and less than 25% compared to the length of the orthologous gene in *D. pseudoobscura*). The expression spreadsheets show expression of orthologs of co-amplified X/Y genes in *D. pseudoobscura* and *D. melanogaster*, and GO analysis shows the orthologous genes in *D. melanogaster* and GO terms that were significantly enriched among co-amplified X/Y genes (using either Gorilla or PantherDB).

**Supplementary Table 5. Clustering of multi-copy Y and co-amplified X/Y genes.** Genome intervals of clustered (within 100kb of each other) multi-copy genes and co-amplified genes and their *Drosophila pseudoobscura* gene ID (FBgn).

**Supplementary Table 4**

**Expression of individual copies of multi-copy Y genes and co-amplified X/Y genes.** Shown is the inferred fraction of individual gene copies expressed, depending on different cut-offs.

| Number of reads mapping<br>(with mapq > 20) | Fraction of individual gene copies expressed |                      |
|---------------------------------------------|----------------------------------------------|----------------------|
|                                             | Multi-copy Y genes                           | Co-amplified Y genes |
| 2 unique reads                              | 71%                                          | 94%                  |
| 5 unique reads                              | 60%                                          | 88%                  |
| 10 unique reads                             | 50%                                          | 79%                  |

**Supplementary Table 6****Y-chromosome replacement lines used in the study.**

Shown is the collection location for the different Y chromosome replacement lines generated.

| <b>Y-replacement line</b> | <b>Collection location of Y line</b> | <b>Collection year of Y line</b> | <b>Isofemale (Y) line originally described in</b> |
|---------------------------|--------------------------------------|----------------------------------|---------------------------------------------------|
| MSH22 Y <sup>0101.7</sup> | Port Coquitlam, B.C., Canada         | N/A                              | Yi and Charlesworth 2000                          |
| MSH22 Y <sup>BB51</sup>   | Big Bear, California                 | 2017                             | present study                                     |
| MSH22 Y <sup>MA03.2</sup> | Mather, California                   | 2003                             | Bartolomé and Charlesworth 2006                   |
| MSH22 Y <sup>MA03.4</sup> | Mather, California                   | 2003                             | Bartolomé and Charlesworth 2006                   |
| MSH22 Y <sup>MS2</sup>    | Mt. Seymour, B.C., Canada            | 2017                             | present study                                     |
| MSH22 Y <sup>NB79</sup>   | Mt. Hood, Oregon                     | 2017                             | present study                                     |
| MSH22 Y <sup>TO203</sup>  | Wellington, Washington               | 2017                             | present study                                     |

### Supplementary Table 7

List of top amplified multi-copy Y genes (i.e. high copy number Y genes), their copy number on the Y, and tissue of highest expression on *D. pseudoobscura* (as a proxy for ancestral expression).

| <b><i>D. melanogaster</i></b><br><b>ortholog</b> | <b>Copy #</b> | <b>Highest expression</b><br><b>in <i>D. pseudoobscura</i></b> |
|--------------------------------------------------|---------------|----------------------------------------------------------------|
| CG15657                                          | 72            | testis                                                         |
| Hmg-2                                            | 69            | ovary                                                          |
| fand                                             | 65            | ovary                                                          |
| RhoGAP54D                                        | 55            | ovary                                                          |
| Drak                                             | 49            | ovary                                                          |
| CG16787                                          | 40            | testis                                                         |
| thr                                              | 28            | ovary                                                          |
| Cap-G                                            | 25            | ovary                                                          |
| CG14490                                          | 25            | NA                                                             |
| CG3955                                           | 24            | adult male head                                                |
| CG13326                                          | 24            | testis                                                         |
| CG14154                                          | 22            | testis                                                         |
| sand                                             | 19            | testis & ovary                                                 |
| Dg                                               | 19            | ovary                                                          |
| Cg30460                                          | 18            | adult male                                                     |

**Supplementary Table 8**

List of top co-amplified X/ Y genes with well-characterized roles in meiosis or siRNA, their copy number, and inferred function in *D. melanogaster*.

| <i>D. melanogaster</i> ortholog | X copy # | Y copy # | Function                                                           |
|---------------------------------|----------|----------|--------------------------------------------------------------------|
| polo                            | 37       | 11       | meiotic spindle assembly                                           |
| shu                             | 22       | 50       | piRNA biogenesis                                                   |
| CG10822                         | 22       | 45       | microtubule-based movement                                         |
| panx                            | 22       | 2        | piRNA-guided silencing                                             |
| AGO2                            | 18       | 2        | siRNA interaction/ RISC                                            |
| Incenp                          | 17       | 8        | microtubule binding, meiotic chromosome condensation               |
| FANCI                           | 12       | 9        | DNA polymerase binding                                             |
| subito                          | 11       | 8        | spindle organization, chromosome segregation                       |
| zip                             | 9        | 5        | ATP binding, ATPase activity                                       |
| Best2                           | 9        | 70       | chloride channel activity                                          |
| cuff                            | 9        | 7        | production of siRNA, piRNA metabolic process                       |
| Klp61F                          | 8        | 27       | microtubule binding, microtubule motor activity                    |
| SMC2                            | 7        | 3        | chromosome condensation                                            |
| Dicer-2                         | 6        | 26       | RNAi pathway                                                       |
| mars                            | 6        | 48       | spindle organization, kinetochore assembly, chromosome segregation |
| ord                             | 5        | 18       | meiotic sister chromatid cohesion, chromosome segregation          |
| fest                            | 5        | 145      | spindle assembly involved in male meiosis                          |
| scra                            | 2        | 9        | microtubule binding                                                |

**Supplementary Table 9**

Small RNA mapping from testis, for single copy X and Y genes, multi-copy Y genes and their X homologs, and co-amplified X and Y genes

| <b>smRNA Categories</b>      | median (counts) | median (counts/length) | Log2(median (counts)) | Log2(median (counts/length)) |
|------------------------------|-----------------|------------------------|-----------------------|------------------------------|
| <b>neo-X copies</b>          |                 |                        |                       |                              |
| Single-copy Y                | 21              | 0.00782661             | 4.392317              | -6.997397                    |
| Multi-copy Y                 | 23              | 0.008840616            | 4.523562              | -6.821637                    |
| Co-amplified X/Y             | 43              | 0.03284672             | 5.426265              | -4.928107                    |
| <b>P-values</b>              |                 |                        |                       |                              |
| <b>(Log2(counts/length))</b> | Single-copy     | Multi-copy             | Co-amplified X/Y      |                              |
| Single-copy Y                | -               | 0.3159                 | < 2.2e-16             |                              |
| Multi-copy Y                 | -               | -                      | < 2.2e-16             |                              |
| Co-amplified X/Y             | -               | -                      | -                     |                              |
| <b>neo-Y copies</b>          |                 |                        |                       |                              |
| Single-copy Y                | 17              | 0.006932409            | 4.087463              | -7.172428                    |
| Multi-copy Y                 | 17              | 0.009580838            | 4.087463              | -6.705632                    |
| Co-amplified X/Y             | 134             | 0.08941301             | 7.066089              | -3.483377                    |
| <b>P-values</b>              |                 |                        |                       |                              |
| <b>(Log2(counts/length))</b> | Single-copy     | Multi-copy             | Co-amplified X/Y      |                              |
| Single-copy Y                | -               | 8.46E-09               | < 2.2e-16             |                              |
| Multi-copy Y                 | -               | -                      | < 2.2e-16             |                              |
| Co-amplified X/Y             | -               | -                      | -                     |                              |

**Supplementary Table 10**

Sequence data generated and SRA accession numbers.

| Species           | strain                    | Sex    | Tissues                                             | Library type                         | Accession number | Reference                  |
|-------------------|---------------------------|--------|-----------------------------------------------------|--------------------------------------|------------------|----------------------------|
| <i>D. miranda</i> | MSH22                     | mixed  | third instar larvae                                 | ChIP-seq, MSL-tap<br>ChIP-seq, Input | SRR789659        | Alekseyenko et al.<br>2013 |
| <i>D. miranda</i> | MSH22                     | male   | third instar larvae                                 | Control                              | SRR789646        | Alekseyenko et al.<br>2013 |
| <i>D. miranda</i> | MSH22                     | female | Female third instar larvae                          | total RNA                            | SRR899848        | Zhou & Bachtrog 2012       |
| <i>D. miranda</i> | MSH22                     | female | virgin female carcass                               | total RNA                            | SRR364804        | Zhou & Bachtrog 2012       |
| <i>D. miranda</i> | MSH22                     | female | whole virgin female                                 | total RNA                            | SRR364800        | Zhou & Bachtrog 2012       |
| <i>D. miranda</i> | MSH22                     | female | Female spermatheca                                  | total RNA                            | SRR4416187       | Zhou & Bachtrog 2012       |
| <i>D. miranda</i> | MSH22                     | female | virgin female ovary                                 | total RNA                            | SRR364801        | Zhou & Bachtrog 2012       |
| <i>D. miranda</i> | MSH22                     | male   | Male third instar larvae                            | total RNA                            | SRR899847        | Zhou & Bachtrog 2012       |
| <i>D. miranda</i> | MSH22                     | male   | virgin male carcass                                 | total RNA                            | SRR364803        | Zhou & Bachtrog 2012       |
| <i>D. miranda</i> | MSH22                     | male   | whole virgin male<br>virgin male accessory<br>gland | total RNA                            | SRR364798        | Zhou & Bachtrog 2012       |
| <i>D. miranda</i> | MSH22                     | male   | virgin male testis                                  | total RNA                            | SRR364802        | Zhou & Bachtrog 2012       |
| <i>D. miranda</i> | MSH22                     | male   | virgin male testis                                  | total RNA, stranded                  | SRR364799        | Zhou & Bachtrog 2012       |
| <i>D. miranda</i> | MSH22                     | male   | virgin male testis                                  | total RNA, stranded                  | SRR9204764       | this study                 |
| <i>D. miranda</i> | MSH22                     | male   | virgin male testis                                  | small RNA                            | SRR9204764       | this study                 |
| <i>D. miranda</i> | MSH22 Y <sup>0101.7</sup> | male   | whole adult                                         | gDNA                                 | SRR9211917       | this study                 |
| <i>D. miranda</i> | MSH22 Y <sup>BB51</sup>   | male   | whole adult                                         | gDNA                                 | SRR9211916       | this study                 |
| <i>D. miranda</i> | MSH22 Y <sup>MA03.2</sup> | male   | whole adult                                         | gDNA                                 | SRR9211919       | this study                 |
| <i>D. miranda</i> | MSH22 Y <sup>MA03.4</sup> | male   | whole adult                                         | gDNA                                 | SRR9211918       | this study                 |
| <i>D. miranda</i> | MSH22 Y <sup>MS2</sup>    | male   | whole adult                                         | gDNA                                 | SRR9211921       | this study                 |
| <i>D. miranda</i> | MSH22 Y <sup>NB79</sup>   | male   | whole adult                                         | gDNA                                 | SRR9211920       | this study                 |
| <i>D. miranda</i> | MSH22 Y <sup>TO203</sup>  | male   | whole adult                                         | gDNA                                 | SRR9211922       | this study                 |
| <i>D. miranda</i> | MA03.4                    | male   | whole adult                                         | gDNA                                 | SRR9648609       | this study                 |
| <i>D. miranda</i> | 101.7                     | male   | whole adult                                         | gDNA                                 | SRR9648608       | this study                 |
| <i>D. miranda</i> | MA03.2                    | male   | whole adult                                         | gDNA                                 | SRR9648607       | this study                 |

## Additional Supplementary Files

Data Supplement 1. Repeat library used for masking the *D. miranda* genome (fasta file).

Data Supplement 2 Repeat annotation of the *D. miranda* genome (gff file).

Data Supplement 3 Gene annotation (all genes) of the *D. miranda* genome (gff file).

Data Supplement 4 Gene annotation of multi-copy Y genes and their orthologs in the *D. miranda* genome (gff file).

Data Supplement 5 Gene annotation of co-amplified X and Y genes in the *D. miranda* genome (gff file).

Data Supplement 6. Gene expression values (TPM) for multi-copy Y genes, and co-amplified Y genes, in different *Drosophila miranda* male tissues, and tissue-specificity index tau.

Data Supplement 7. Gene copy numbers for co-amplified X/Y genes.

Data Supplement 8. Gene expression values (TPM) for co-amplified X and Y gene families, in different *Drosophila miranda* male tissues.

Data Supplement 9. Gene expression values (FPKM) for orthologs of co-amplified X/Y genes in different *Drosophila pseudoobscura* male and female tissues.

Data Supplement 10. Sense and anti-sense testis total RNA summed counts for co-amplified genes.

Data Supplement 11. Sense and anti-sense testis small RNA summed counts for co-amplified genes.

Data Supplement 12. Testis total RNA counts for all copies of a gene family for different categories of genes on the X/neo-X and Y/neo-Y-chromosome.

Data Supplement 13. Testis small RNA raw counts for different categories of genes on the X/neo-X and Y/neo-Y-chromosome .

Data Supplement 14. Fasta alignment of co-amplified X/Y genes and their *D. pseudoobscura* ortholog.

Data Supplement 15. MSL ChIP and Input counts (normalized to library size) for neo-X genes whose homolog is classified as single-copy or multi-copy Y/neo-Y.

Data Supplement 16. Gene expression values (TPM) for single-copy Y genes, multi-copy Y genes, and co-amplified Y genes, and their neo-X/X homologs in different *Drosophila miranda* tissues. Expression values for all copies of a gene family are shown individually.

Data Supplement 17. Gene expression values (TPM) for multi-copy Y genes, and co-amplified X and Y genes in different *Drosophila miranda* tissues. Expression values for all copies of a gene family are summed.

Data Supplement 18. Gene expression values (FPKM) for orthologs of co-amplified X/Y genes in different *Drosophila melanogaster* tissues.
